# Supplementary figures and images for: Dynamically tunable lamellar surface structures from magnetoactive elastomers driven by a uniform magnetic field
Source: Royal Society of Chemistry journal article supplement (doi:10.1039/d3sm00012e), 2023-01-01

# Reflectance of sample in STICKING regime

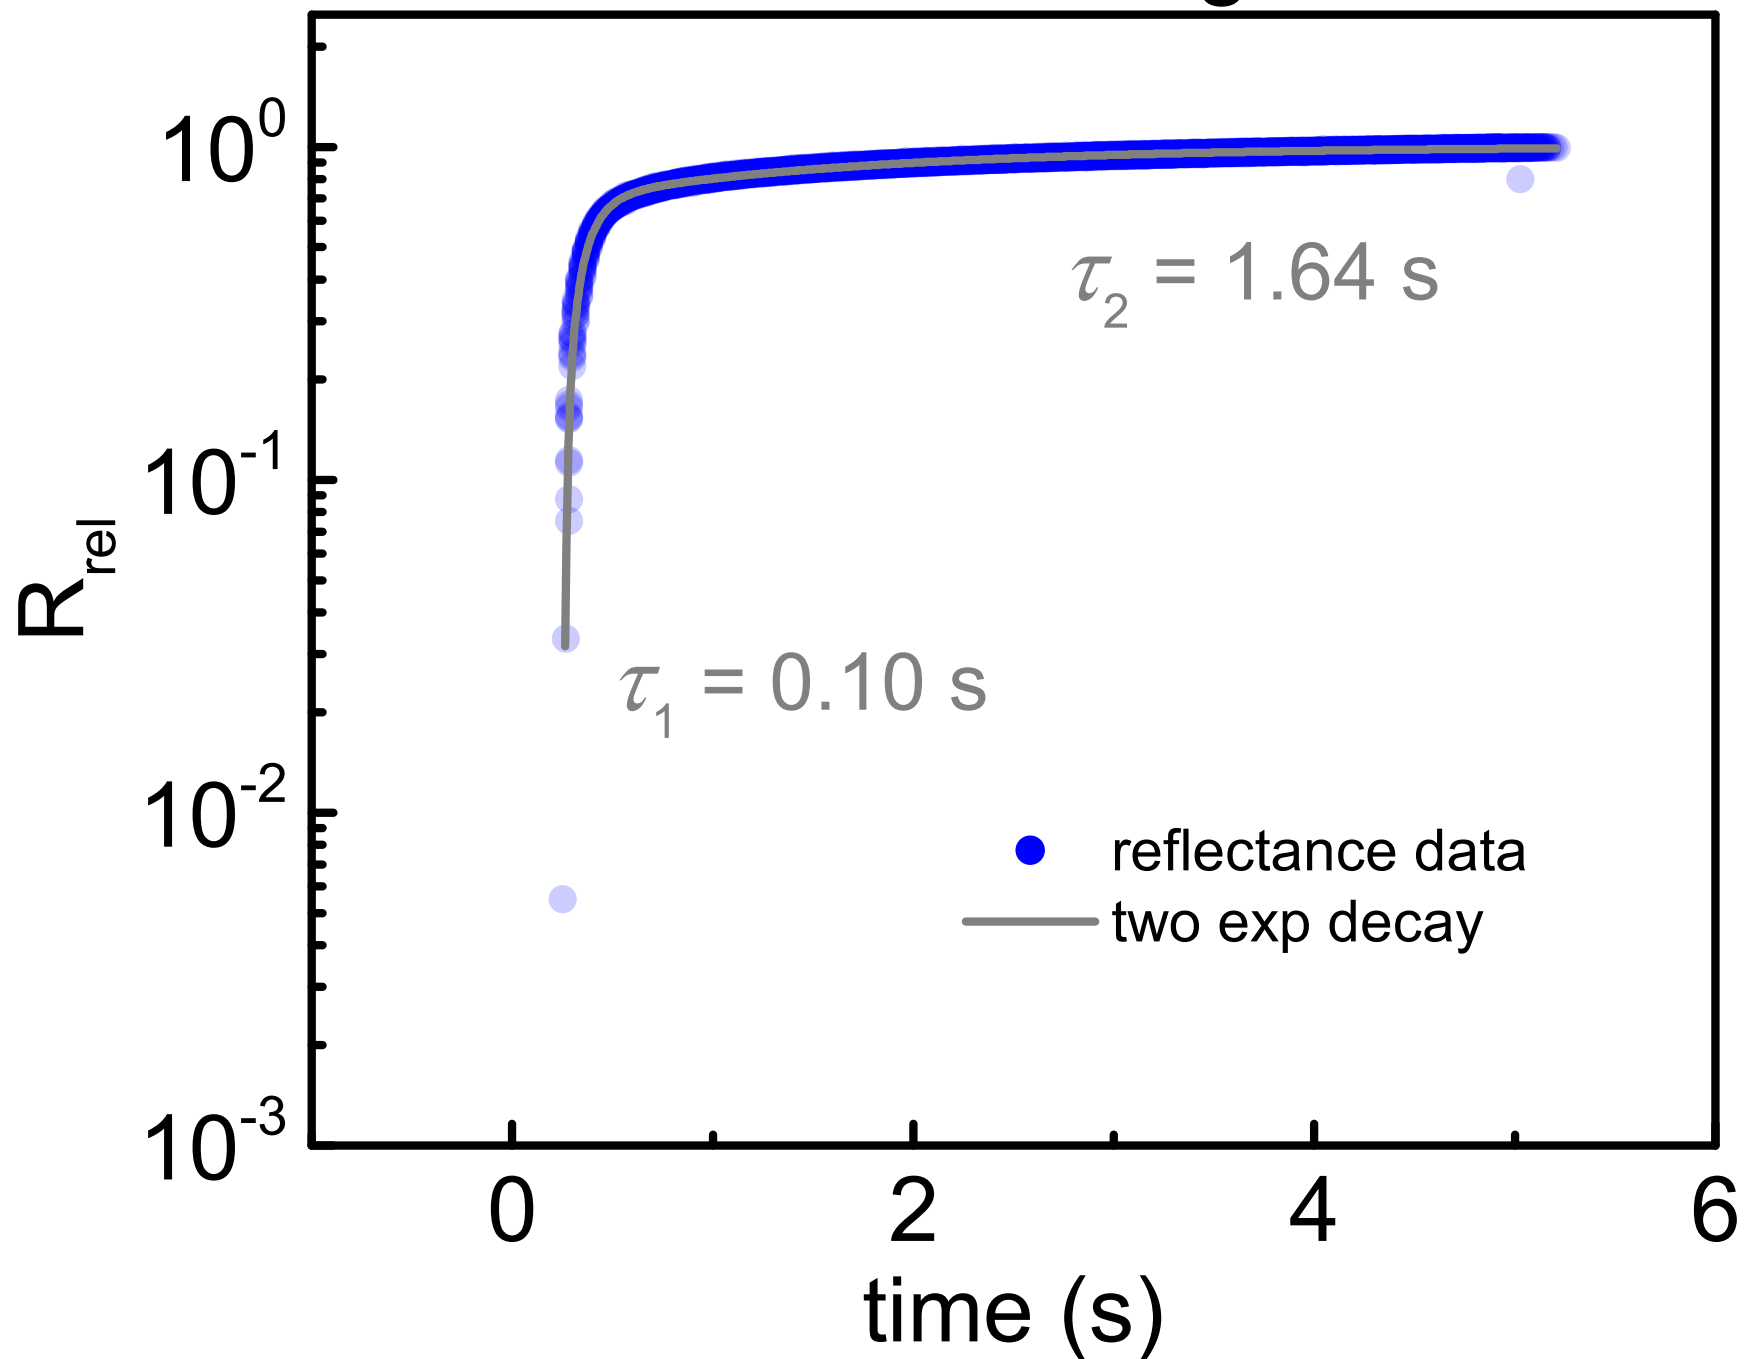

Supplement: d3sm00012e2.pdf [file d3sm00012e2.pdf]

# Reflectance of sample in STRETCHING regime

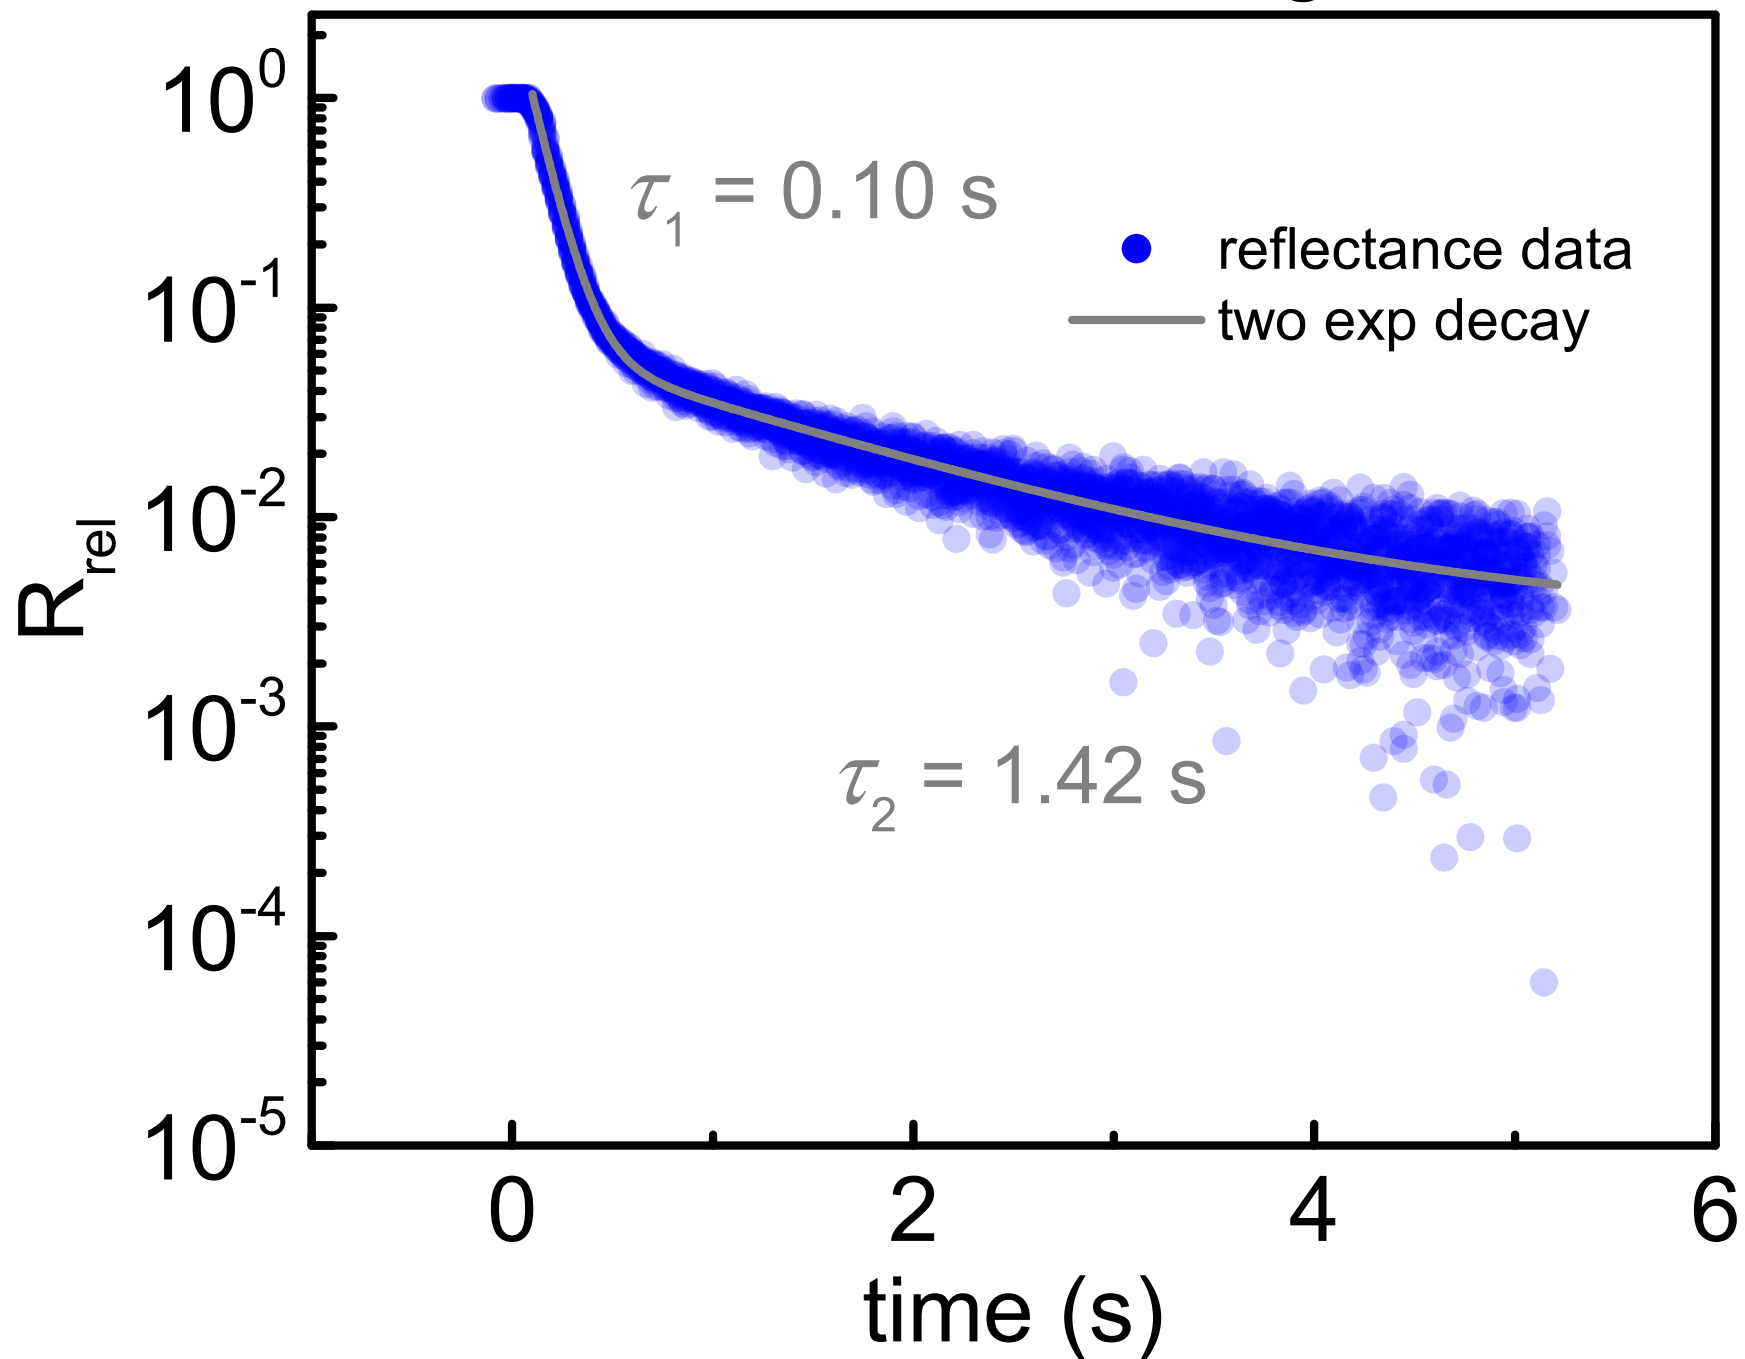

Supplement: d3sm00012e3.pdf [file d3sm00012e3.pdf]
